# Supplementary material
Source: PubMed Central journal article supplement (PMC2951237)
Supplement: supp_M110.148429_jbc.M110.148429-1.pdf [file supp_M110.148429_jbc.M110.148429-1.pdf]

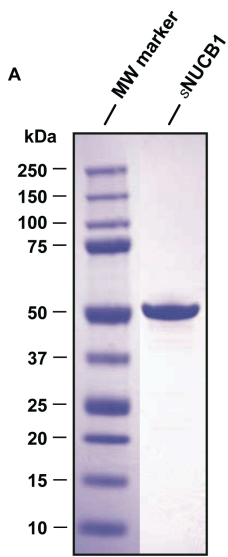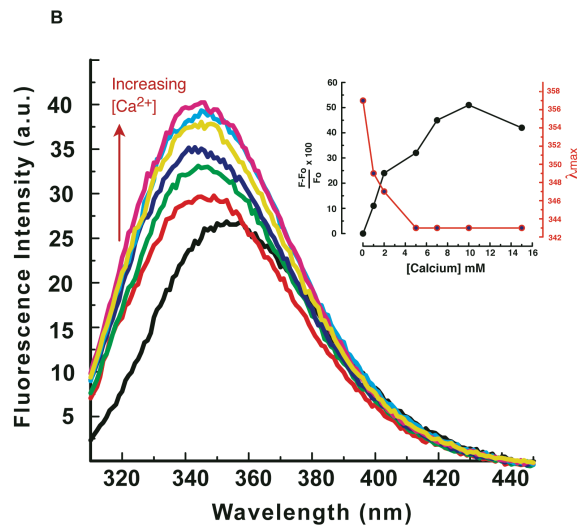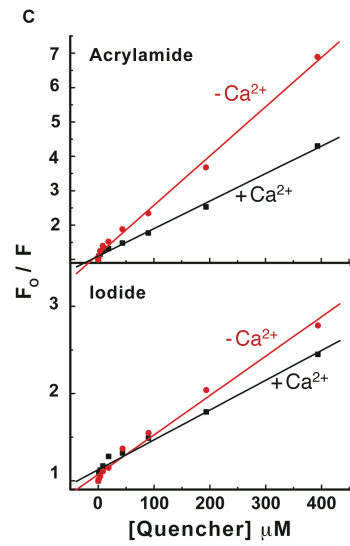

**Fig. S1. Tryptophan residues (W233 and W333) as an intrinsic probe to monitor conformational changes associated with Ca<sup>2+</sup> binding.** (A) SDS-PAGE analysis of *s*NUCB1 shows a single band after final step of purification. The protein band migrates at ~ 51 kDa. (B) Ca<sup>2+</sup>-free *s*NUCB1 was used for determining the conformational changes associated with Ca<sup>2+</sup> binding. 178 nM *s*NUCB1 was titrated with increasing amounts of Ca<sup>2+</sup> in a 3 ml cuvette while the fluorescence spectra were collected at room temperature. Fluorescence emission was collected from 310 to 460 nm with the excitation set at 295 nm. Black trace indicates Ca<sup>2+</sup>-free *s*NUCB1, while the red, green, navy blue, yellow, light blue and pink traces represent 1 mM, 2 mM, 5 mM, 7 mM, 10 mM and 15 mM Ca<sup>2+</sup> added to the protein. Bold arrow in red represents the increase in fluorescence intensity. Inset: Change in fluorescence intensity is indicated by black circles, while the red circles indicate the blue shift of the Trp fluorescence. With increasing concentration of Ca<sup>2+</sup>, the emission intensity enhanced by 50%, while there was a 15 nm blue shift on binding to Ca<sup>2+</sup> to *s*NUCB1 indicative of the movement of Trp residues from a polar environment to a non-polar, hydrophobic region. All experiments were repeated at least three times. (C) We measured the accessibility of Trp residues of *s*NUCB1 to small molecule quenchers, acrylamide and iodide, in the presence and absence of Ca<sup>2+</sup>. Acrylamide is a neutral quencher while iodide is an ionic quencher and its hydrated size is larger than acrylamide. Steady-state fluorescence measurements were done in SPEX  $\tau$ 3 fluorimeter at 25 °C with the excitation at 295 nm, while the emission spectra were collected from 315 nm to 460 nm. Stern-Volmer plot was calculated by taking the emission maxima at 330 nm. *s*NUCB1 (333 nM with and without Ca<sup>2+</sup>) in 50 mM Tris, pH 8.0, 100 mM NaCl was used and the inner filter effect was nullified by taking a very small aliquot of the quenchers from concentrated stock solutions. In the case of iodide, a small quantity of (~0.1 mM) sodium thiosulfate was added to prevent it from forming free iodide. The top panel shows the quenching of *s*NUCB1 Trp residues in the presence (black trace) and absence (red trace) of acrylamide. The bottom panel shows quenching of *s*NUCB1 Trp residues in the presence (black trace) and absence (red trace) of ionic quencher, iodide. F/F<sub>0</sub> vs quencher concentration gave a straight line indicative of a dynamic quenching rather than static quenching. The quenching by acrylamide both in the presence and absence of Ca<sup>2+</sup> was larger than the iodide showing that the two Trp residues are in different environments. Ca<sup>2+</sup> binding to *s*NUCB1 caused a considerably greater decrease in the observed acrylamide quenching relative to iodide. This shows that the conformational change associated with Ca<sup>2+</sup> binding reorients the Trp residues in an environment inaccessible to either quencher.

A

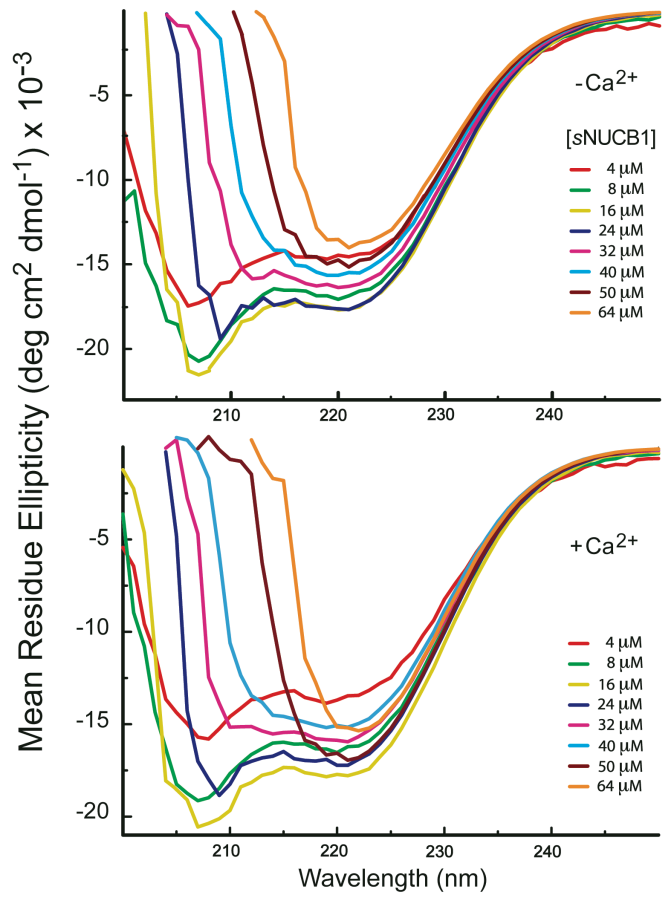

B

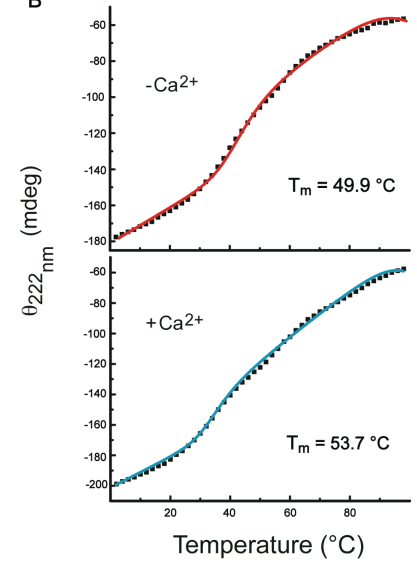

C

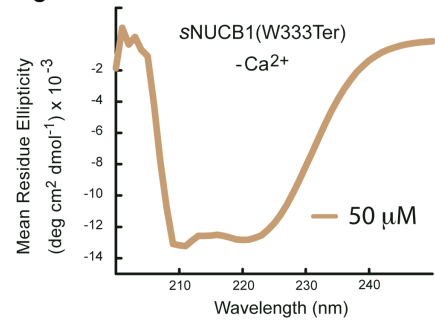

**Fig. S2. Secondary structure transition in *s*NUCB1 (- / + Ca<sup>2+</sup>) with increasing concentration.** Far-UV circular dichroism spectra of (A) Ca<sup>2+</sup>-free or (B) Ca<sup>2+</sup>-bound *s*NUCB1 were collected with increasing concentration. At lower concentrations, i.e. 4 μM (red), 8 μM (green), 16 μM (yellow) and 24 μM (blue), CD spectra show that *s*NUCB1 is mainly helical. At 32 μM (pink), the CD spectrum shows a reduction in the helical content. Higher concentrations of *s*NUCB1, i.e. 40 μM (cyan), 50 μM (brown) and 64 μM (orange), show primarily β-sheet secondary structure. We also monitored thermal unfolding of *s*NUCB1. Thermal unfolding transitions of recombinant (A) Ca<sup>2+</sup>-free and (B) Ca<sup>2+</sup>-bound *s*NUCB1 (8 μM) were monitored by recording CD signal at 222 nm at a heating rate of 1°C / min. The trace is indicative of a multistep non-cooperatively folded protein. The T<sub>m</sub> for the Ca<sup>2+</sup>-bound *s*NUCB1 is higher than T<sub>m</sub> for the Ca<sup>2+</sup>-free protein, indicating the enhanced stability of the protein in the Ca<sup>2+</sup>-bound state. (C) The CD spectrum for *s*NUCB1(W333Ter) at 50 μM concentration displays a majorly helical secondary structure. In each experiment, the spectrum for buffer (50 mM Tris pH 8.0, 150 mM NaCl) alone was subtracted from each of the spectra.

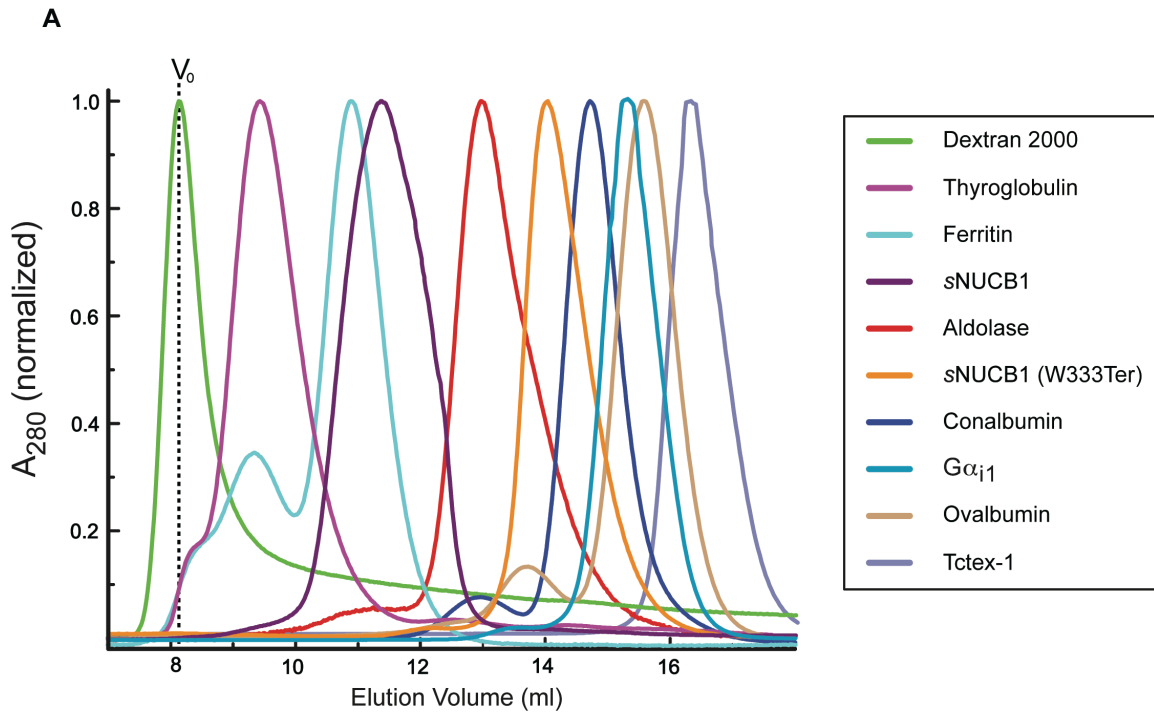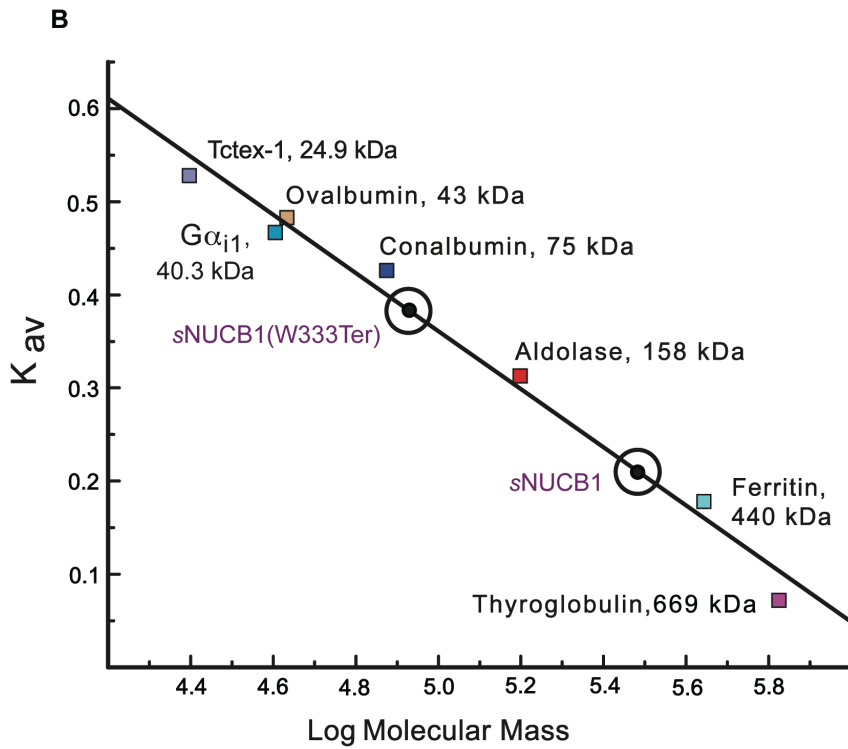

**Fig. S3. Size-exclusion chromatography (SEC) of *s*NUCB1 and molecular weight standards.** (A) SEC of *s*NUCB1, heavy molecular weight standards (GE Health Sciences) along with known globular proteins was done using a Superdex200 10/30 HR column. Proteins were individually injected onto the column and the absorbance normalized elution profile for each protein was plotted as a function of elution volume. (B) The void volume ( $V_o$ ) of the column is derived from the elution of Blue Dextran, whereas elution volume ( $V_e$ ) for each protein is obtained from the corresponding peak for each sample. In order to estimate the molecular mass of *s*NUCB1 and *s*NUCB1(W333Ter), a calibration curve was prepared by plotting  $K_{av} [(V_e - V_o)/(V_c - V_o)]$  vs  $\log(\text{molecular weight})$  where  $V_c$  is the geometric volume of the column. The data were fit to a linear equation. The estimated molecular mass of *s*NUCB1 and *s*NUCB1(W333Ter) were obtained from the plot by using their corresponding  $K_{av}$  values.

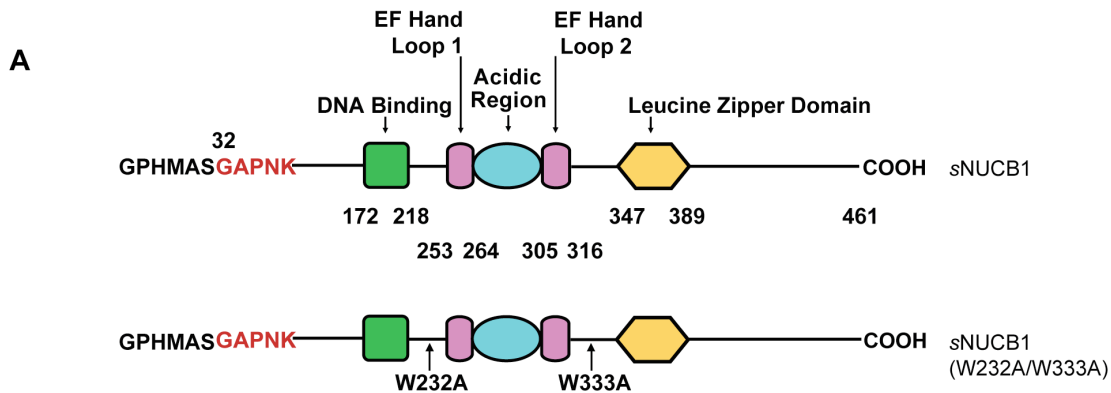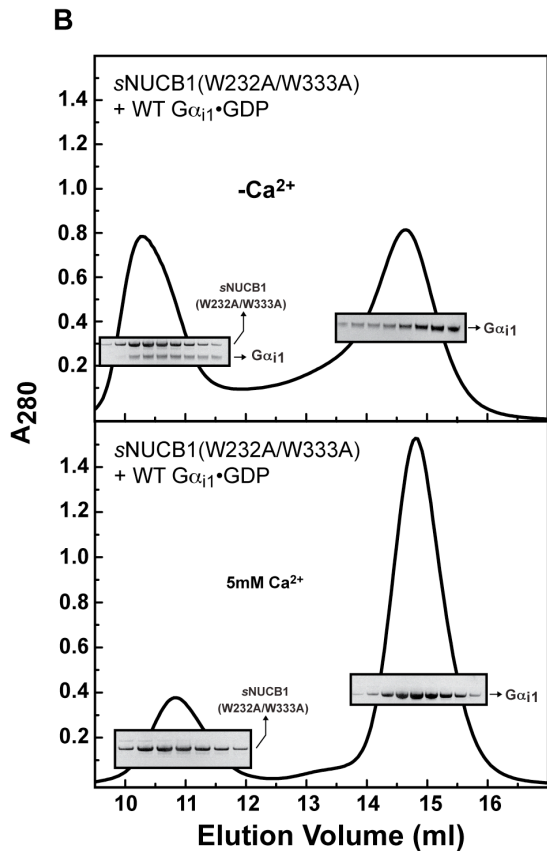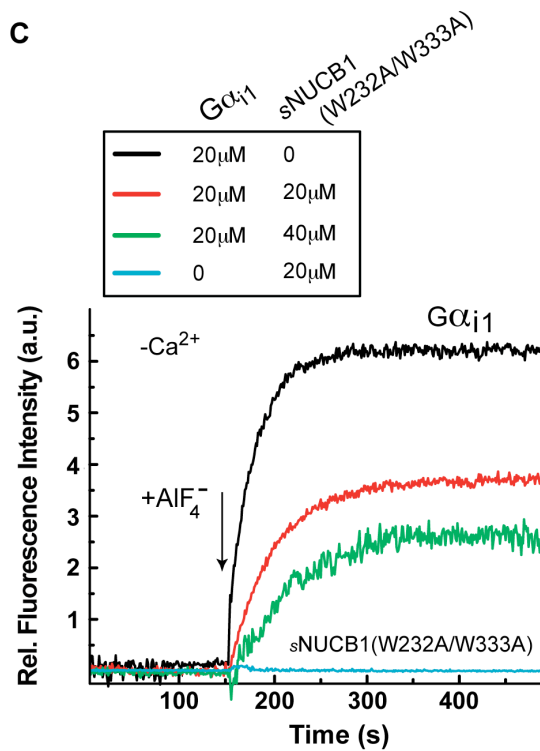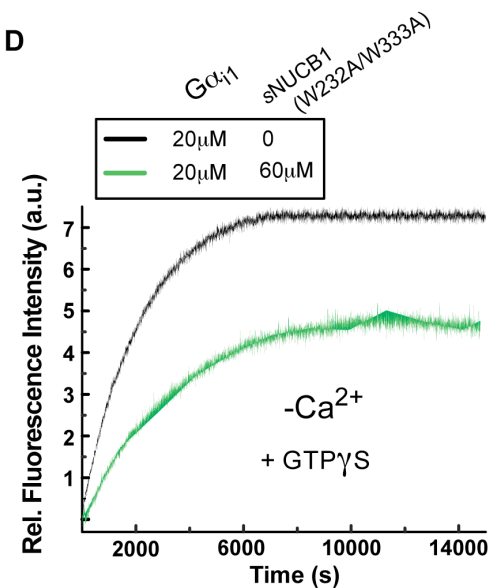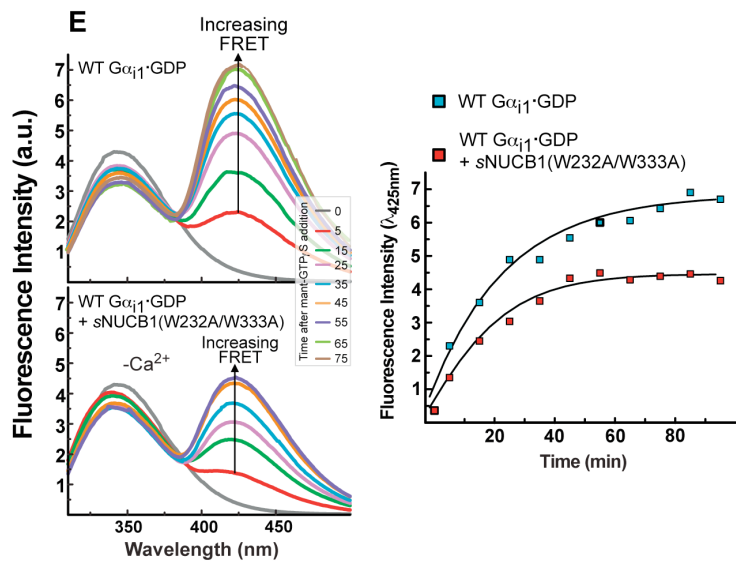

**Fig. S4. *s*NUCB1 affects nucleotide-exchange by WT  $G\alpha_{i1}$ .** (A) The domain diagram of *s*NUCB1 highlights the modular structure of protein. Trp residues in the sequence of *s*NUCB1 that were mutated to generate *s*NUCB1(W232A/W333A) are listed below it. (B) We first used size-exclusion chromatography to establish the nature of interaction between *s*NUCB1(W232A/W333A) and  $G\alpha_{i1}$  in solution under several conditions. *s*NUCB1(W232A/W333A) and  $G\alpha_{i1}\cdot\text{GDP}$  were incubated together in the absence (*upper*) or presence (*lower*) of  $\text{Ca}^{2+}$  and the mixture was subjected to size-exclusion chromatography using a Superdex200 10/30 HR column. Peak fractions were analyzed by SDS-PAGE with Coomassie-brilliant blue staining as shown in the insets. As shown, *s*NUCB1(W232A/W333A) and  $G\alpha_{i1}\cdot\text{GDP}$  form a complex only in the absence of  $\text{Ca}^{2+}$  and not when  $\text{Ca}^{2+}$  is bound to *s*NUCB1(W232A/W333A). Further, to investigate the effect of *s*NUCB1 / *s*NUCB1(W232A/W333A) on nucleotide exchange (C) we employed a time-based intrinsic Trp fluorescence assay to measure the rate of spontaneous nucleotide exchange by  $G\alpha_{i1}\cdot\text{GDP}$  in the presence of increasing concentrations of *s*NUCB1. The fluorescence emission of Trp211, which is situated on the Switch II region of  $G\alpha_{i1}$  increases dramatically on binding of  $\text{AlF}_4$  to  $G\alpha_{i1}\cdot\text{GDP}$ . To eliminate the influence of intrinsic Trp fluorescence from *s*NUCB1 on the measured activation rates, we used site-directed mutagenesis to engineer a Trp free version of *s*NUCB1, *s*NUCB1(W2323A/W333A).  $G\alpha_{i1}\cdot\text{GDP}$  alone (20  $\mu\text{M}$ , black trace) was allowed to equilibrate while Trp fluorescence emission was recorded at 340 nm. Thereafter,  $\text{AlF}_4$  (20 mM) was injected at 180 seconds and the fluorescence time course was monitored. The same experiment was repeated in the presence of increasing concentrations of *s*NUCB1(W232A/W333A). The rate of  $G\alpha_{i1}\cdot\text{GDP}$  activation by  $\text{AlF}_4$  is considerably decreased upon preincubation with equimolar (red) or excess (green) *s*NUCB1(W2323A/W333A). As a control, *s*NUCB1(W232A/W333A) alone shows no enhancement in Trp fluorescence upon addition of  $\text{AlF}_4$  (blue). (D) In an analogous experiment, we monitored the enhancement in fluorescence emission of Trp211 upon exchange of GDP for  $\text{GTP}\gamma\text{S}$ , a non-hydrolyzable analogue of GTP. The results show that the rate and extent of  $\text{GTP}\gamma\text{S}$ -mediated activation is less when  $G\alpha_{i1}\cdot\text{GDP}$  is bound to  $\text{Ca}^{2+}$ -free *s*NUCB1(W232A/W333A). (E)  $G\alpha_{i1}\cdot\text{GDP}$  activation was also monitored through exchange of bound GDP for fluorescent mant- $\text{GTP}\gamma\text{S}$  nucleotide. Upon uptake of mant- $\text{GTP}\gamma\text{S}$  by  $G\alpha_{i1}$ , Trp211 moves into the catalytic pocket and forms a productive FRET pair which can transfer energy to the nucleotide analogue mant- $\text{GTP}\gamma\text{S}$ . FRET from Trp211 of  $G\alpha_{i1}$  to bound mant- $\text{GTP}\gamma\text{S}$  was measured at different times after addition of mant- $\text{GTP}\gamma\text{S}$ . The same experiment was carried out in the presence of *s*NUCB1(W2323A/W333A). The addition of *s*NUCB1(W2323A/W333A) caused a decrease in the rate of FRET increase, indicating that uptake of mant- $\text{GTP}\gamma\text{S}$  by  $G\alpha_{i1}$  was inhibited. Maximum FRET intensity at 425 nm with increasing time was plotted. A fit to each data set clearly shows attenuation of FRET intensity for  $G\alpha_{i1}$  complexed to  $\text{Ca}^{2+}$ -free *s*NUCB1(W232A/W333A) in comparison to  $G\alpha_{i1}$  alone, suggesting that  $\text{Ca}^{2+}$ -free *s*NUCB1(W232A/W333A) inhibits nucleotide exchange.



T = 180 min

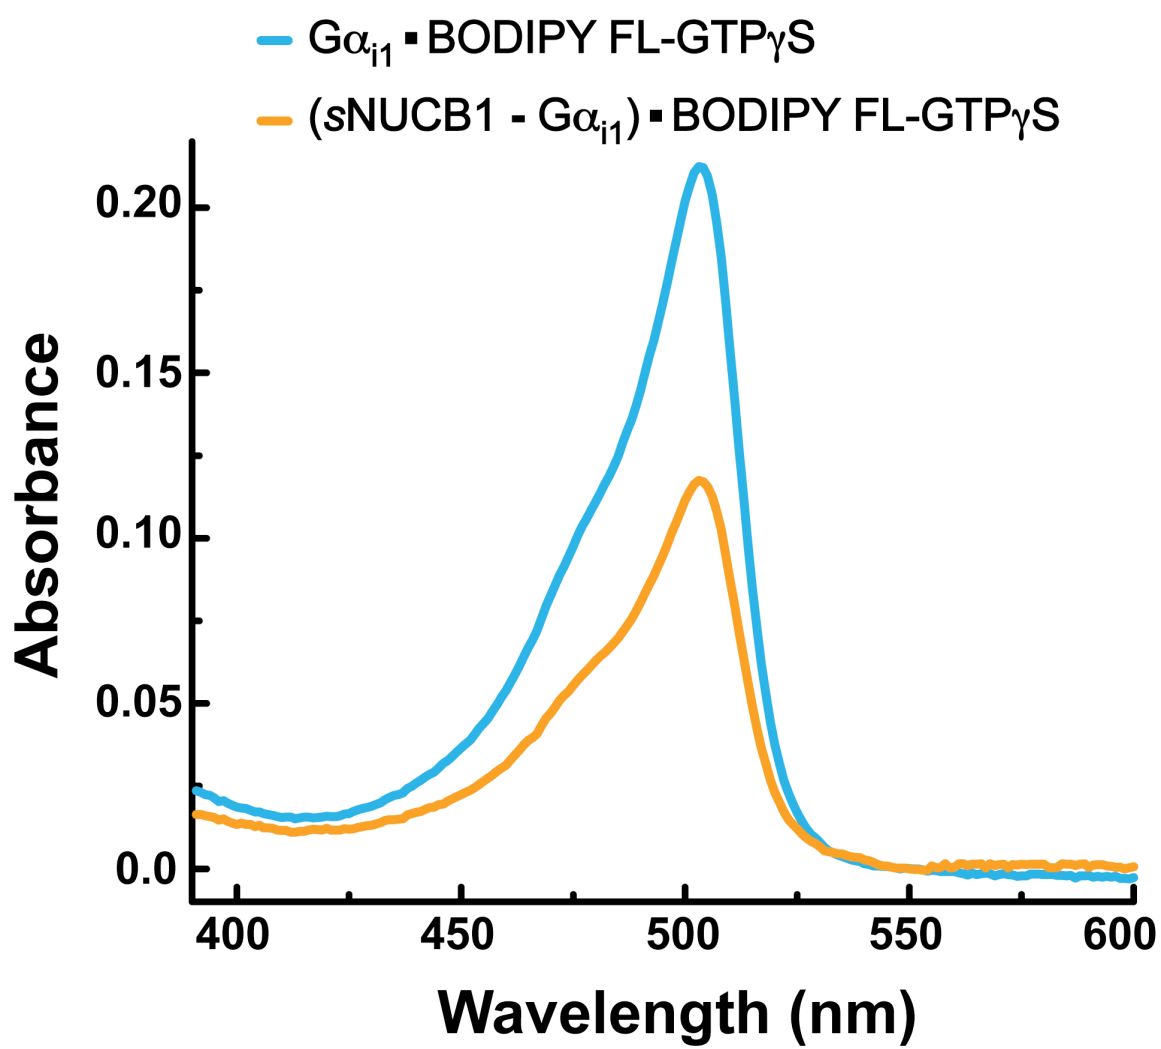

**Fig. S5. BODIPY FL-GTP $\gamma$ S absorbance.** The absorption spectrum for BODIPY FL-GTP $\gamma$ S bound to WT G $\alpha_{i1}$  alone (20  $\mu$ M) (blue) or in complex with Ca<sup>2+</sup>-free sNUCB1 (100  $\mu$ M) (orange) after 180 min is shown. The wavelength scans show that absorbance maxima for BODIPY fluorophore does not change on binding of Ca<sup>2+</sup>-free sNUCB1 to G $\alpha_{i1}$ .

**A**

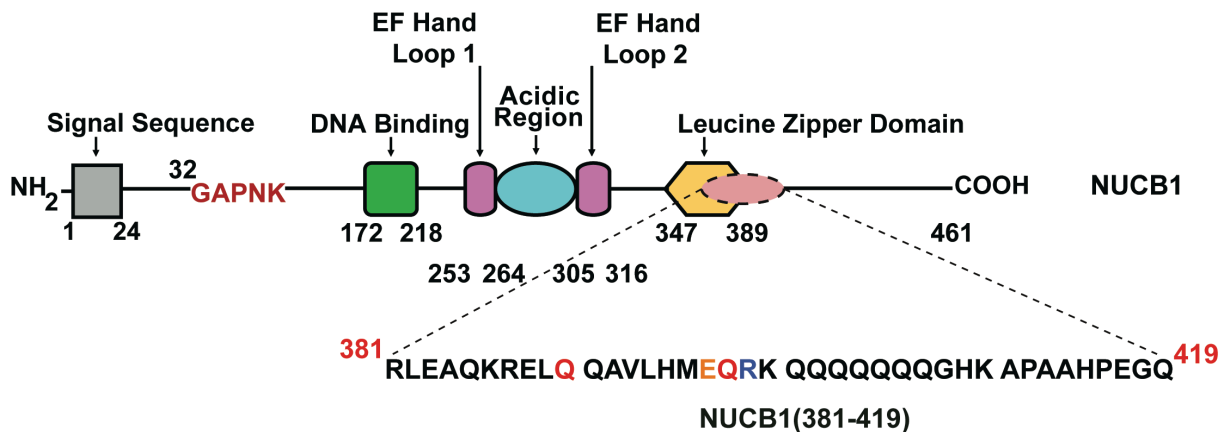

**B**

|                     |                                          |
|---------------------|------------------------------------------|
| rAGS3_GL1           | DEECFFDLLSKFQSSRMDDQRCPLEEGQAGAAEATA---  |
| rAGS3_GL2           | QTEEFFDLIASSQSRRLDDQRASVGLPGLR-ITLNN--   |
| rAGS3_GL3           | GDE-FFNMLIKYQSSRIDDRQCPPDVLPRGPTMPD---   |
| rAGS3_GL4           | D-EDFFSLIQRVQAKRMDEQRVDLAGSPDQEAS--GLP-  |
| hGPM2_GL1           | GDEGFFDLLSRFQSNRMDDQRCCLQEKNCHTASTTTSST  |
| hGPM2_GL2           | NTDEFLLDASSQSRRLDDQRASF'SNLPGLR-LTQNSQS  |
| hGPM2_GL3           | ADEDFFDILVKCQGSRLDDQRCAPPATTKGPTVPDED-   |
| hGPM2_GL4           | D-EDFFSLILRSQGKRMDEQRVLLQRDQNRD'TDF-GLKD |
| mPCP-2_GL1          | DQEGFFNLLTHVQCDRMEEQRCSLQAGPQNPESQG-     |
| mPCP-2_GL2          | EMDNLMDMLVNTQGRMDDQRTVNSLPGFPIGPKD--     |
| RGS12_GL1           | EAEFFELISKAQSNRADDQGLLRKEDLVLPFLR---     |
| RGS14_GL1           | DIEGLVELLNRVQSSGAHDQGLLRKEDLVLPFLQ---    |
| hNUCB1<br>(381-419) | RLEAQKRELQ--QAVLHMEQRKQQQQQQGHKAPAAHP-   |

\*                   \*\*\*

**C**

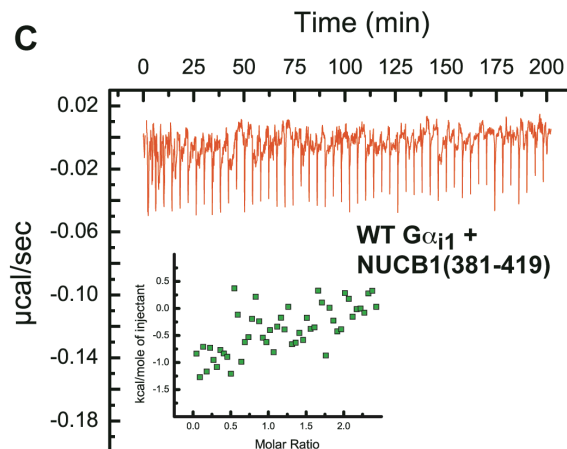

**Fig. S6. NUCB1(381-419) does not bind to WT  $G\alpha_{i1}$ •GDP.** (A) A CT 39 mer sequence of NUCB1 (residues 381-419) consist of the Glu-Gln-Arg (397-399) triad preceded by an upstream Gln390. (B) The sequence alignment of NUCB1(381-419) with various GoLoco motif peptides shows the presence of the conserved Gln and the Asp/Glu-Gln-Arg motif in the sequence. The stars indicate the positions of the conserved residues amongst different sequences. (C) We further used ITC to measure the binding of NUCB1(381-419) to WT  $G\alpha_{i1}$ •GDP. NUCB1(381-419) (600  $\mu$ M) was injected into a buffered solution of WT  $G\alpha_{i1}$ •GDP (40  $\mu$ M) in the reaction cell and the heat released per injection was recorded. The heat of dilution for the addition of  $G\alpha_{i1}$ •GDP to buffer alone was subtracted. The isotherm shows complete absence of any binding event indicating that NUCB1(381-419) does not interact with WT  $G\alpha_{i1}$ •GDP.

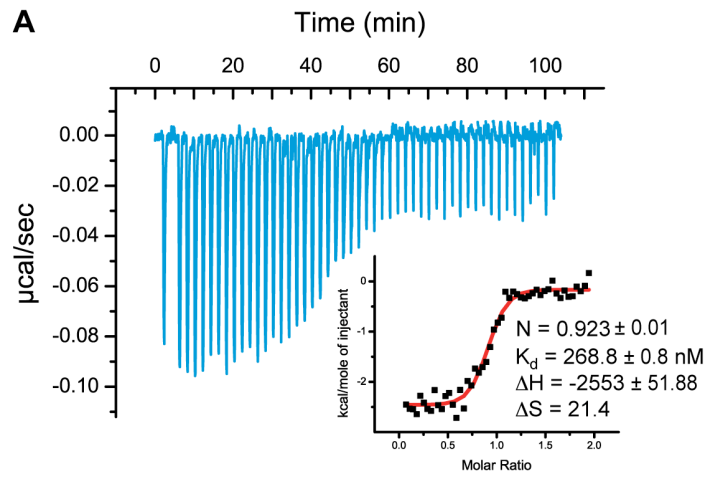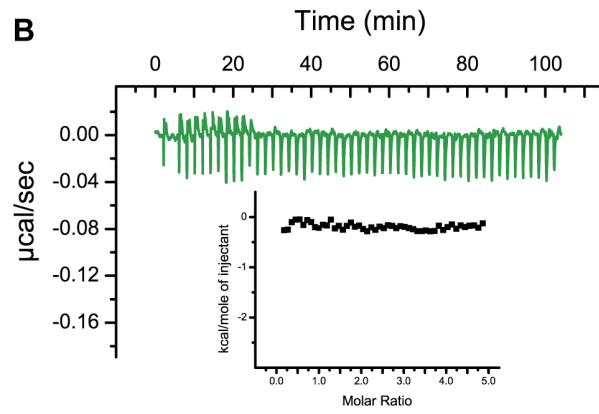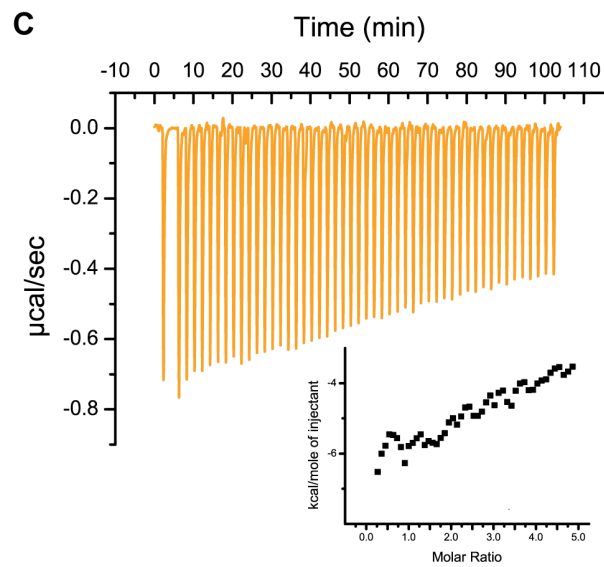

**Fig. S7. *s*NUCB1 inhibits binding of RGS14(496-531) to  $G\alpha_{i1}\cdot\text{GDP}$ .** (A) We performed ITC experiments to measure binding of RGS14(496-531) peptide to  $G\alpha_{i1}\cdot\text{GDP}$ . The heat released per injection of aliquots of a solution of RGS14(496-531) (200  $\mu\text{M}$ ) into a buffered solution of  $G\alpha_{i1}\cdot\text{GDP}$  (20  $\mu\text{M}$ ) was recorded and the area under the curve was integrated. The heat of dilution for the addition of RGS14(496-531) to buffer alone was subtracted. A non-linear least squares fit of the calculated values using the “one-set of sites” model for WT  $G\alpha_{i1}\cdot\text{GDP}$  resulted in a satisfactory fit with a dissociation constant of  $268 \pm 0.01$  nM as shown in the *inset*. Thereafter we performed ITC experiments to measure binding of RGS14(496-531) (500  $\mu\text{M}$ ) to 20  $\mu\text{M}$  buffered solution of  $G\alpha_{i1}\cdot\text{GDP}$  precomplexed to  $\text{Ca}^{2+}$ -free (B) *s*NUCB1 or (C) *s*NUCB1(W333Ter). The corresponding *insets* show lack of any substantial heat release due to complete absence of binding. Thus, binding of either *s*NUCB1 or *s*NUCB1(W333Ter) completely inhibits RGS14(496-531) binding to  $G\alpha_{i1}\cdot\text{GDP}$ .
